# Supplementary material for: Ultrarare Loss-of-Function Mutations in the Genes Encoding the Ionotropic Glutamate Receptors of Kainate Subtypes Associated with Schizophrenia Disrupt the Interaction with PSD95
Source: MDPI journal article supplement (doi:10.3390/jpm12050783), 2022-05-12
Supplement: s1 [file s1]

**Supplementary Table 1.** Primer sequences of semi-qPCR and size of PCR products.

| Amplicon     | Target                  | Forward (5'-3')      | Reverse(5'-3')       | Size (bp) |
|--------------|-------------------------|----------------------|----------------------|-----------|
| <i>GRIK1</i> | <i>GRIK1</i> expression | ACCCTGATGCCTAACACCAC | AAGAGAGCAGCCACACCAAG | 116       |
| <i>GRIK2</i> | <i>GRIK2</i> expression | GATTCAGGTTTGCTGGATGG | TCATCTGGGGAAACTGTTGA | 100       |
| <i>GRIK3</i> | <i>GRIK3</i> expression | CGGAGTCTGGTTTGGGAATA | CGTCCGCATACTCGAAGATT | 115       |
| <i>GRIK4</i> | <i>GRIK4</i> expression | ATGTCCCACACCATCCTCCT | ATCCACAAGGCTGTCCATTC | 114       |
| <i>GRIK5</i> | <i>GRIK5</i> expression | TGCCAGGTGCTCTCATCACT | CTCGATGATCCCGTTGATCT | 117       |
| <i>GAPDH</i> | <i>GAPDH</i> expression | CAATGACCCCTTCATTGACC | GACAAGCTTCCCGTTCTCAG | 106       |
