# Supplementary material for: Ultrarare Loss-of-Function Mutations in the Genes Encoding the Ionotropic Glutamate Receptors of Kainate Subtypes Associated with Schizophrenia Disrupt the Interaction with PSD95
Source: MDPI journal article supplement (doi:10.3390/jpm12050783), 2022-05-12
Supplement: s1 [file s1]

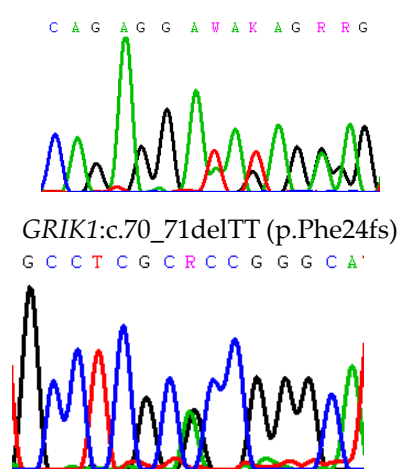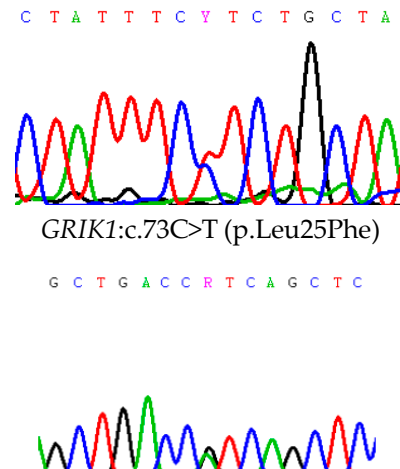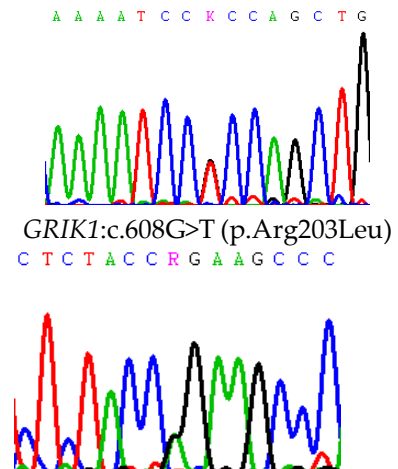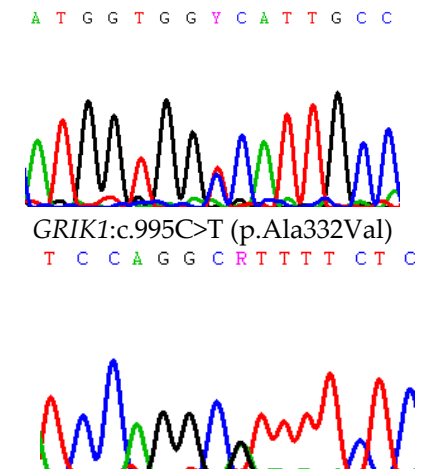

GRIK1:c.1007A>G (p.His336Arg)

GRIK1:c.1027G>A (p.Val343Ile)

GRIK1:c.1673G>A (p.Arg558Gln)

GRIK1:c.1699G>A (p.Val567Ile)

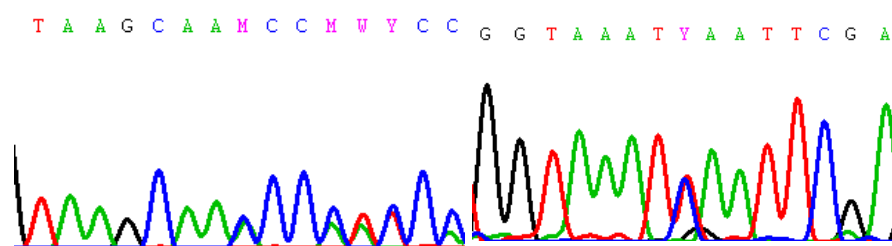

GRIK1:c.2705T>C (p.Leu902Ser)

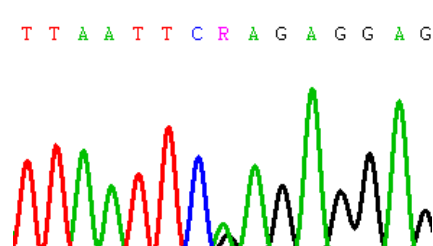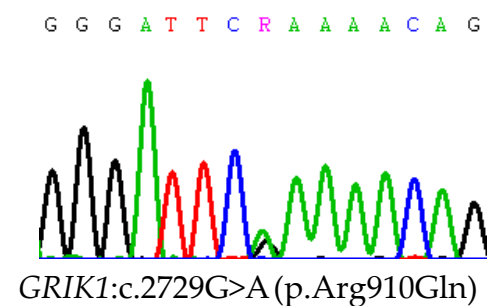

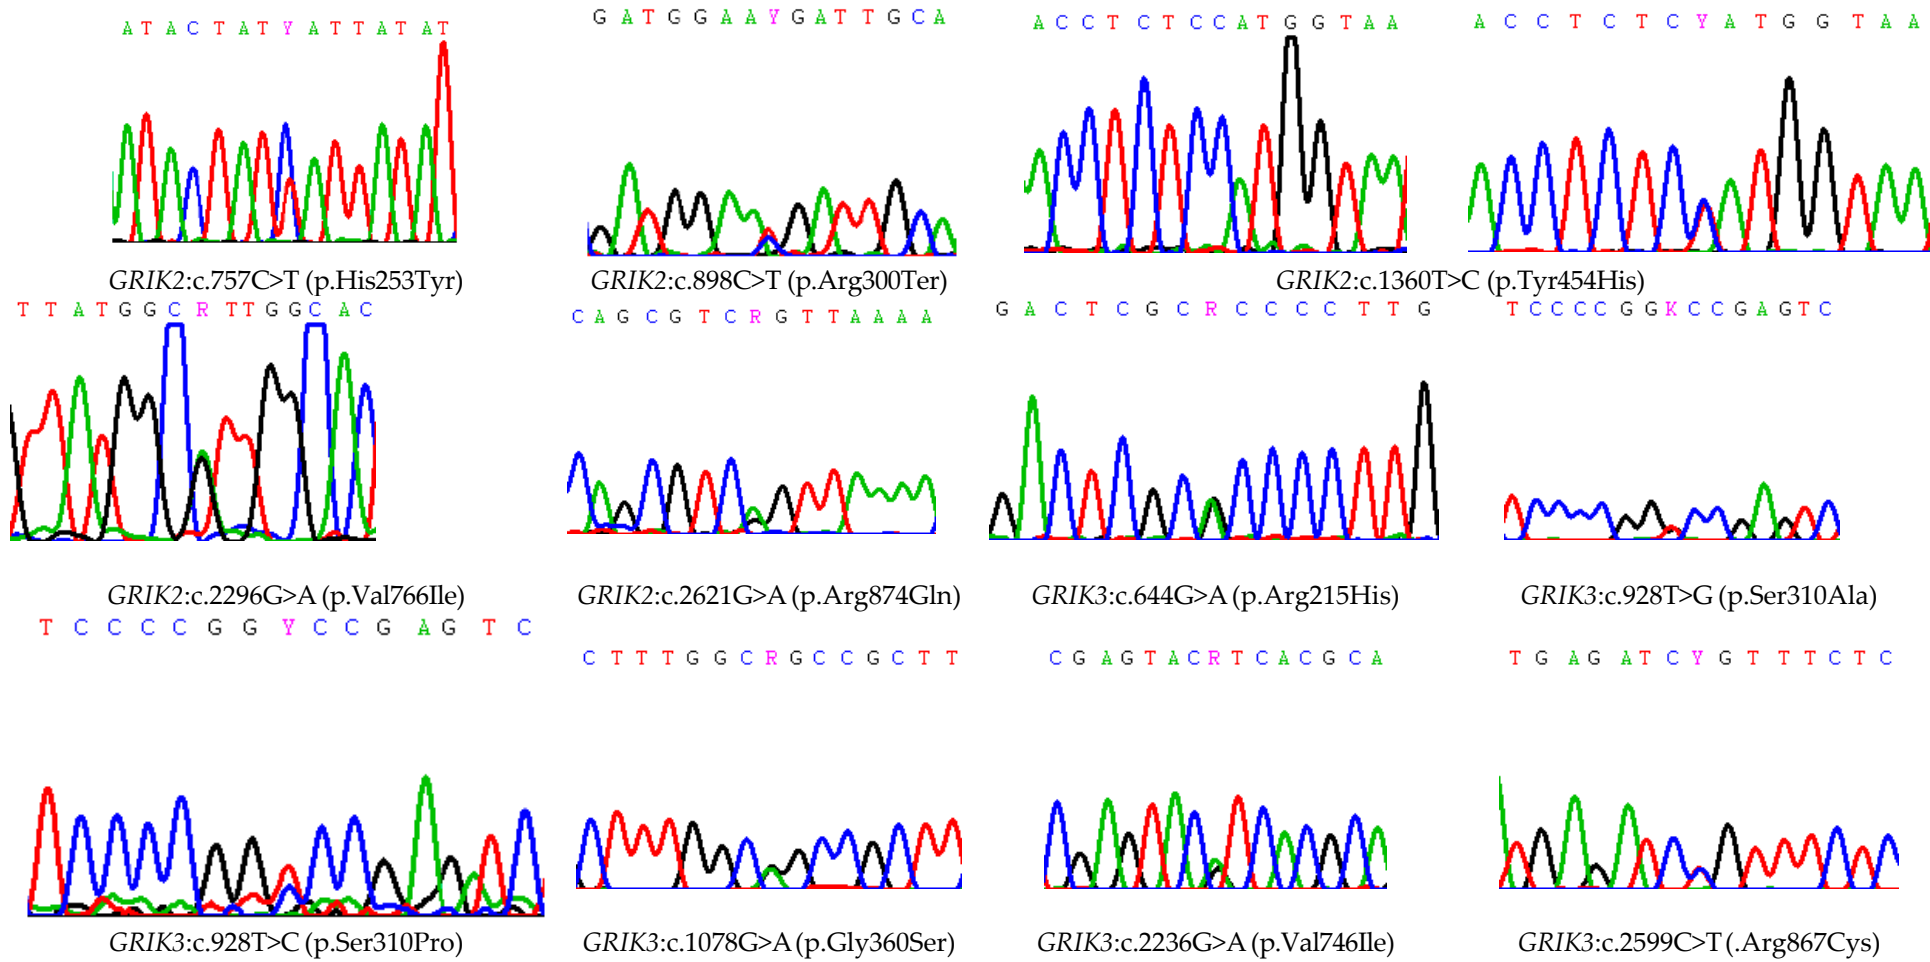

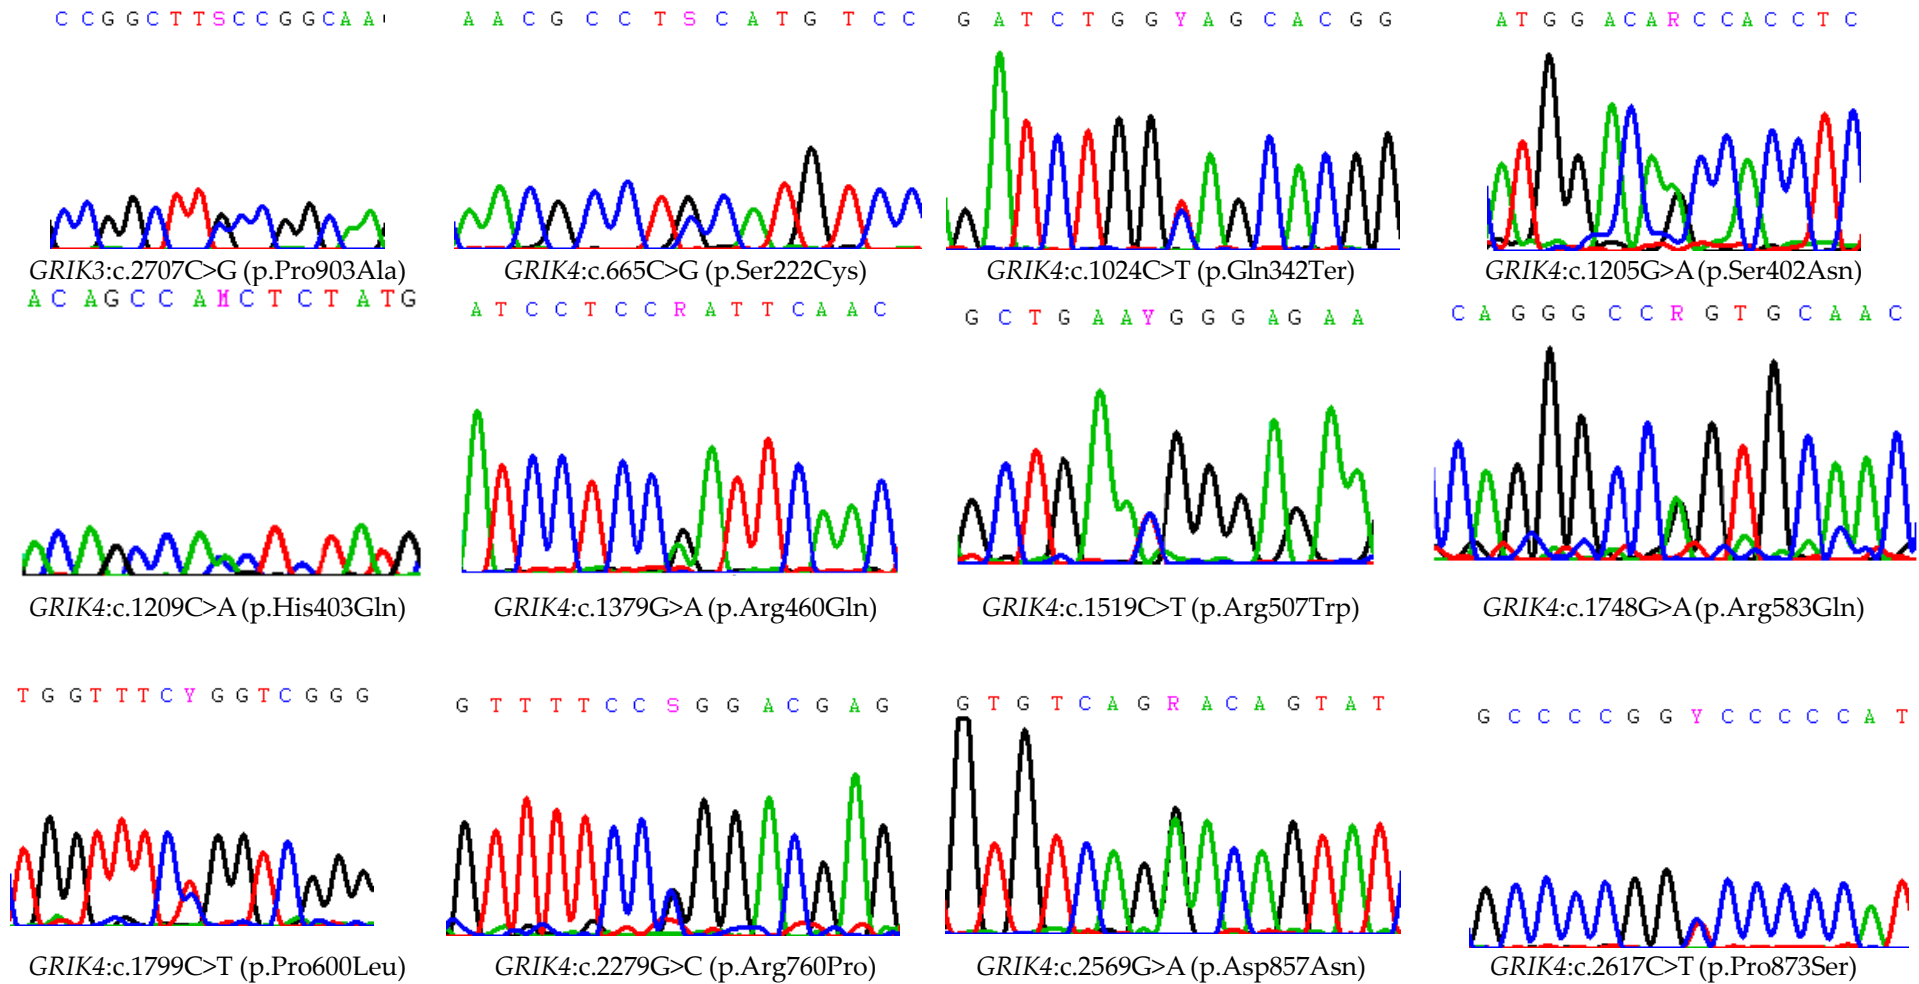

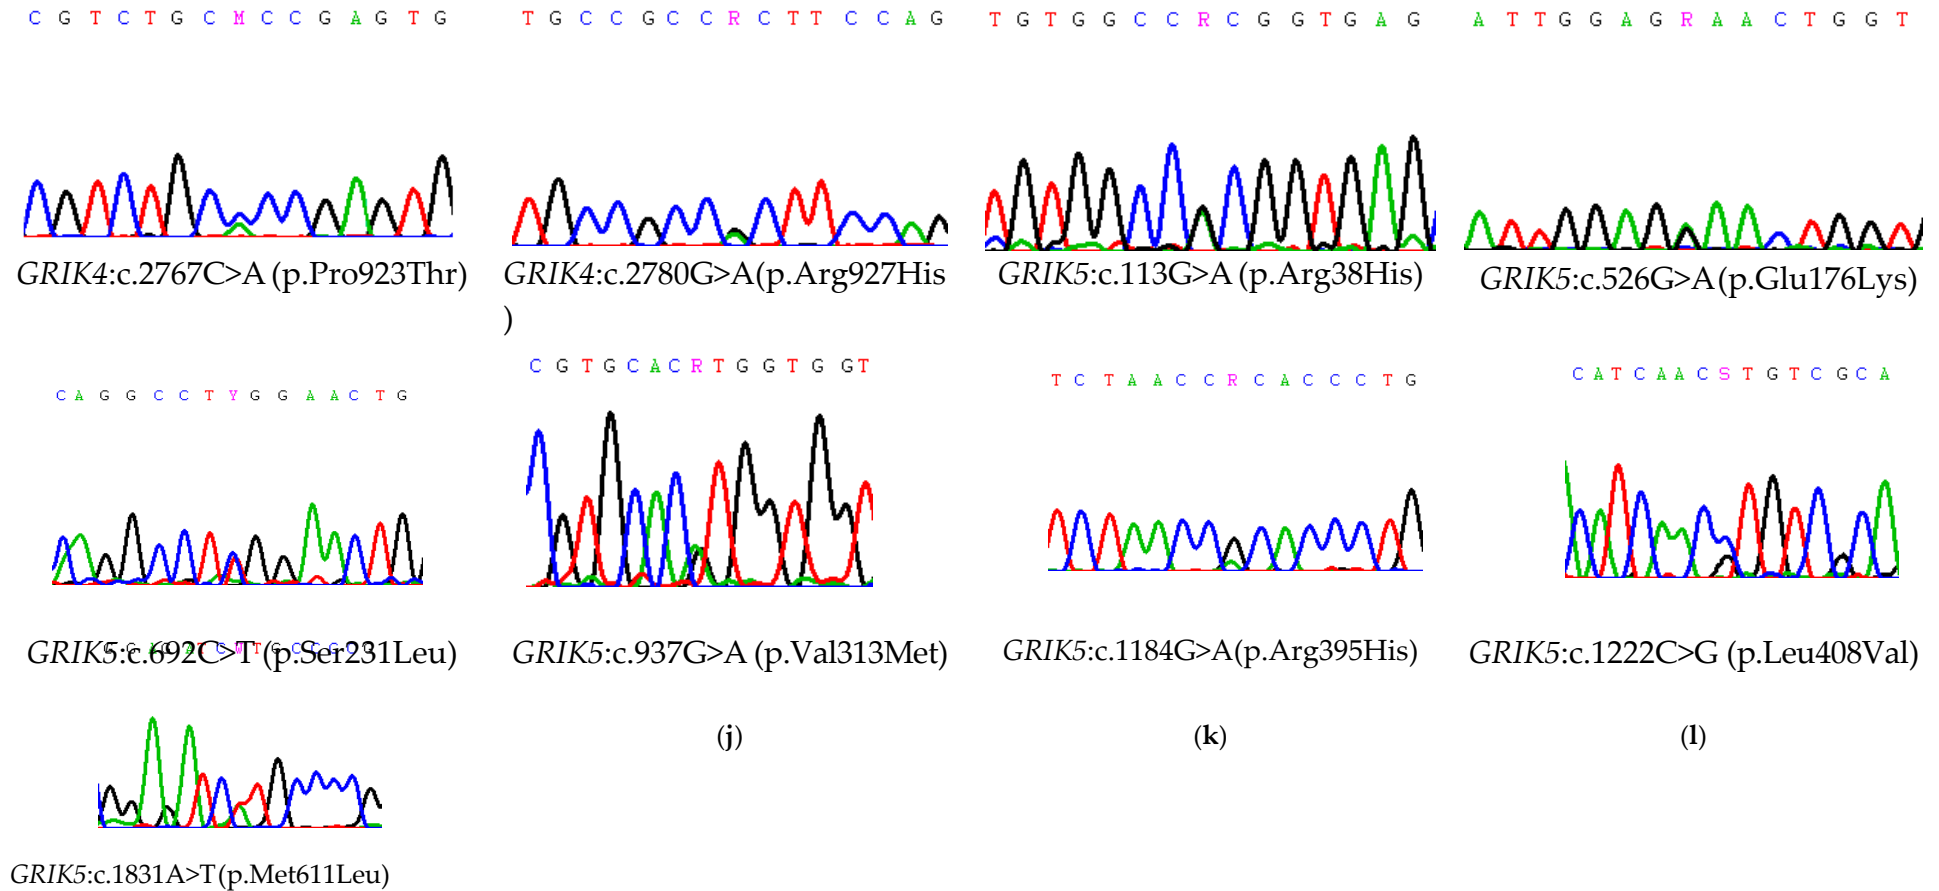

**Supplementary Figure S1. Sequence electropherograms of the protein-altering variants of the GRIK gene family found in patients with schizophrenia.**
