# Supplementary material for: Ultrarare Loss-of-Function Mutations in the Genes Encoding the Ionotropic Glutamate Receptors of Kainate Subtypes Associated with Schizophrenia Disrupt the Interaction with PSD95
Source: MDPI journal article supplement (doi:10.3390/jpm12050783), 2022-05-12
Supplement: s1 [file s1]

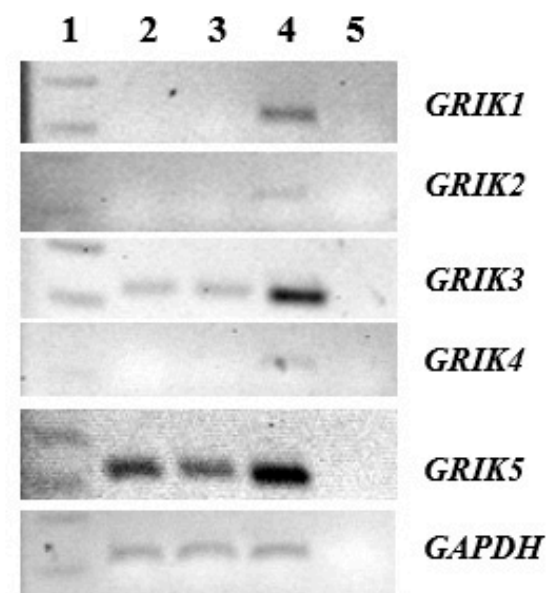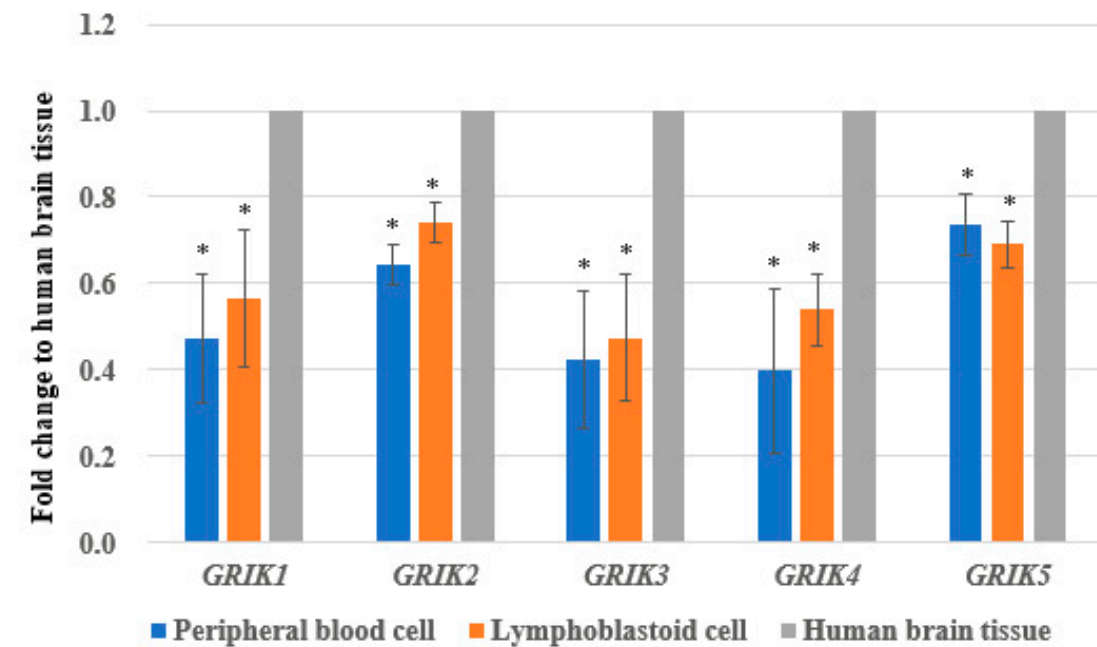

Supplementary Figure S2. The mRNA expression of *GRIK1*, *GRIK2*, *GRIK3*, *GRIK4*, and *GRIK5* genes in peripheral blood cells, lymphoblastoid cells, and the human brain. Lane 1 is the 100 bp ladder DNA marker; lane 2 is the peripheral blood cell; lane 3 is the lymphoblastoid cell; lane 4 is the human brain tissue; lane 5 is the negative control. The *GAPDH* gene was used as an internal control gene. The differences in gene expression activity between the two groups (compared with human brain tissue) were analyzed using Student's t-tests. (\*  $p < 0.05$ ;  $n = 3$ )

(A)

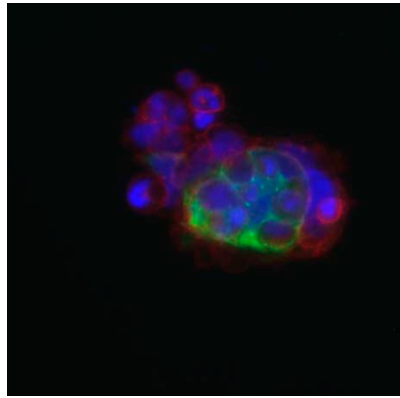

*GRIK1*<sup>WT</sup>

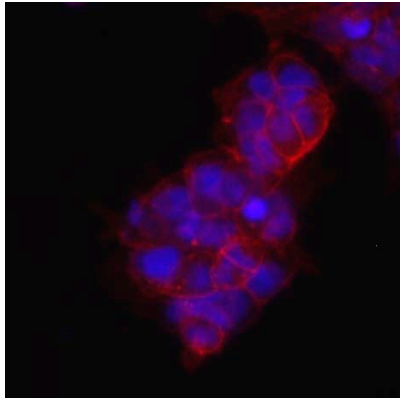

*GRIK1*<sup>p.Phe24fs</sup>

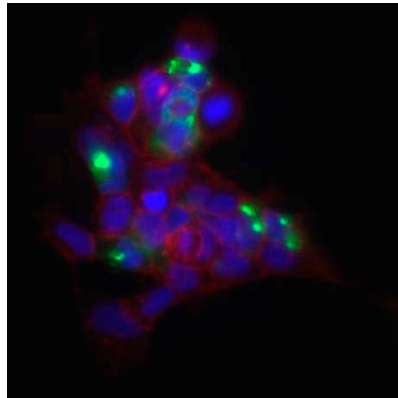

*GRIK1*<sup>p.Leu25Phe</sup>

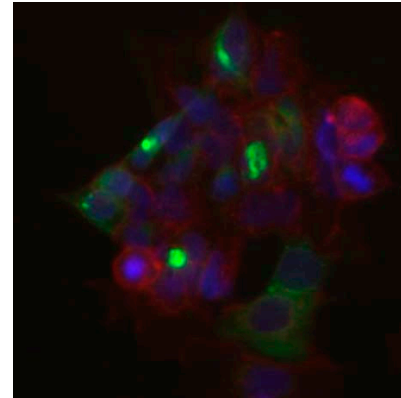

*GRIK1*<sup>p.Arg203Leu</sup>

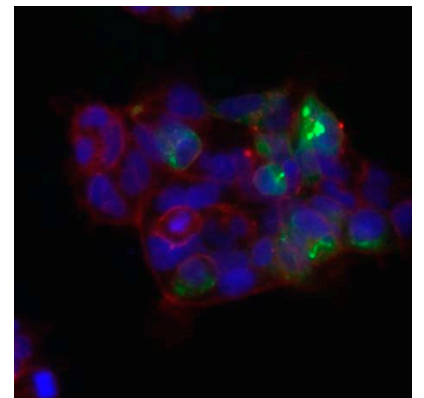

*GRIK1*<sup>p.Ala332Val</sup>

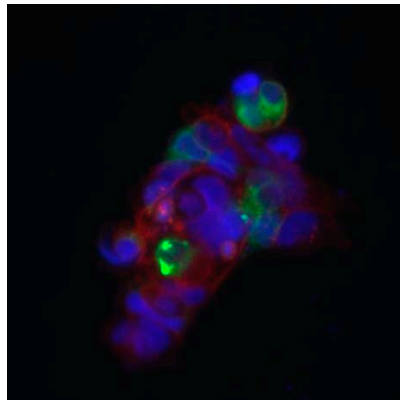

*GRIK1*<sup>p.His336Arg</sup>

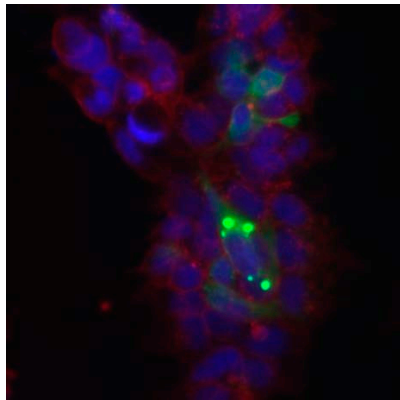

*GRIK1*<sup>p.Val343Ile</sup>

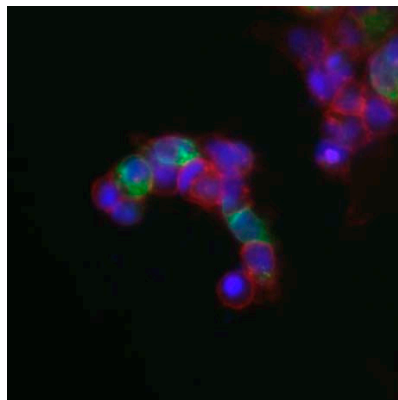

*GRIK1*<sup>p.Arg558Gln</sup>

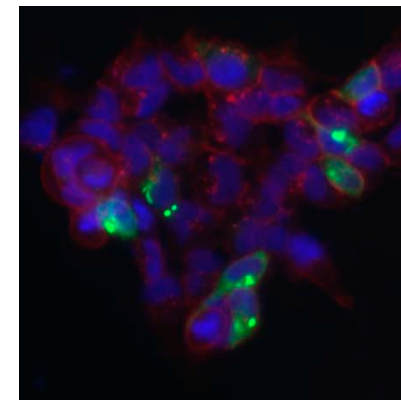

*GRIK1*<sup>p.Val567Ile</sup>

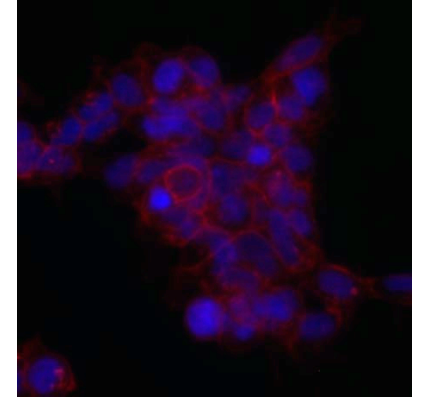

*GRIK1*<sup>p.Thr882fs</sup>

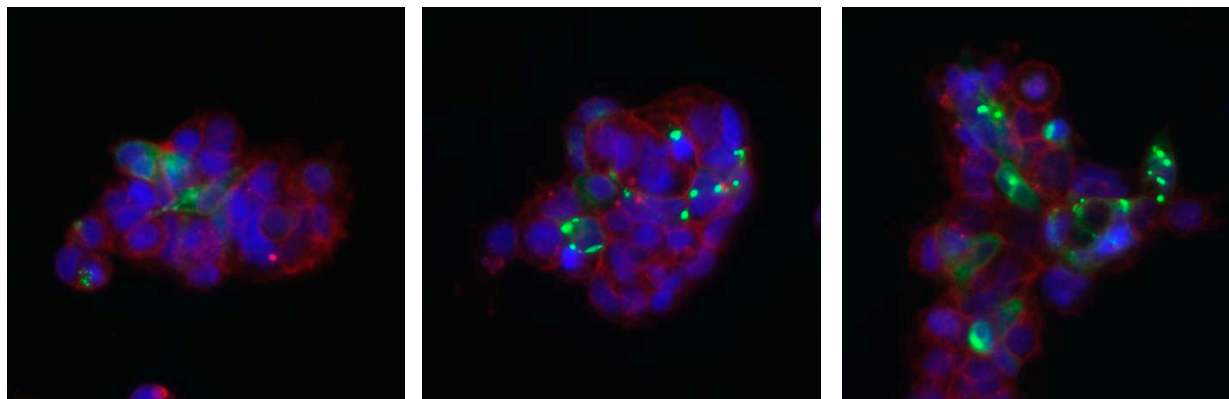

*GRIK1*p.Leu902Ser

*GRIK1*p.Arg904Gln

*GRIK1*p.Arg910Gln

(B)

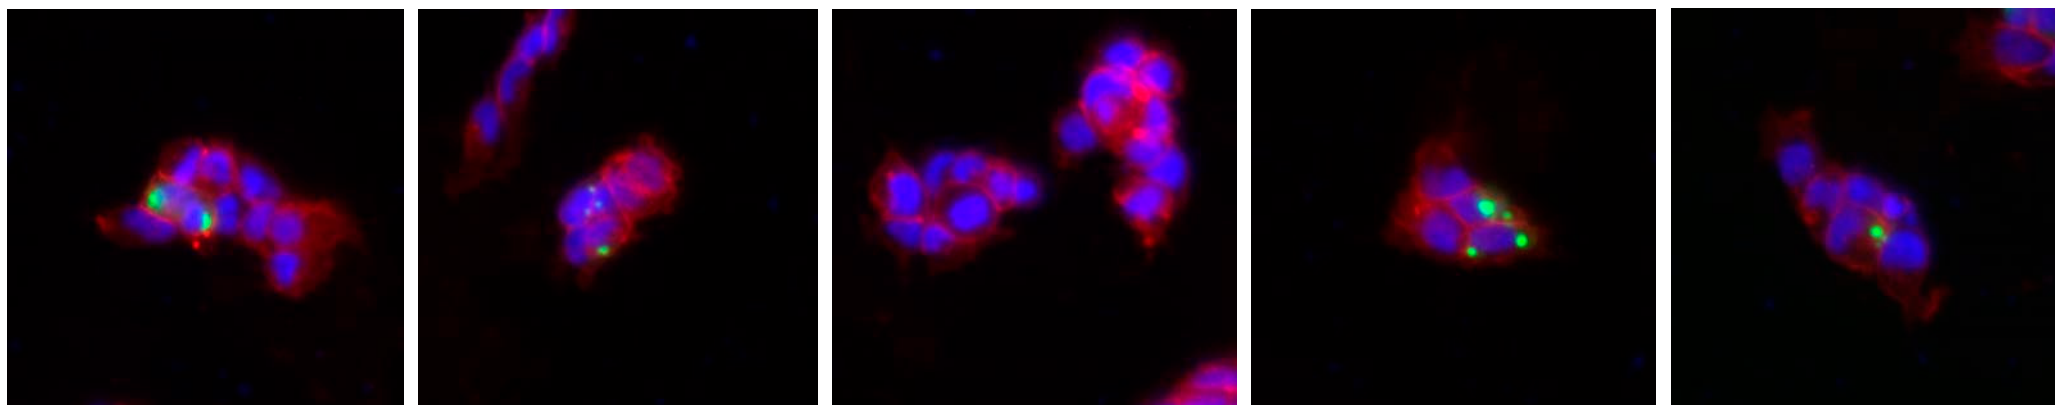

*GRIK2*<sup>WT</sup>

*GRIK2*p.His253Tyr

*GRIK2*p.Arg300Ter

*GRIK2*p.Tyr454His

*GRIK2*p.Val766Ile

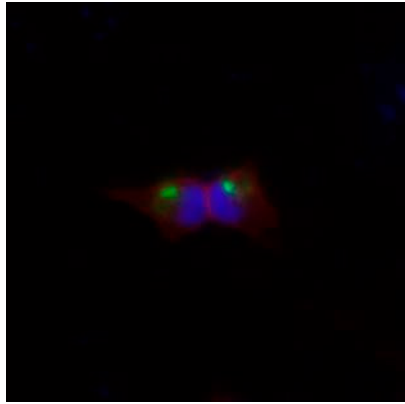

*GRIK2*<sup>p.Arg874Gln</sup>

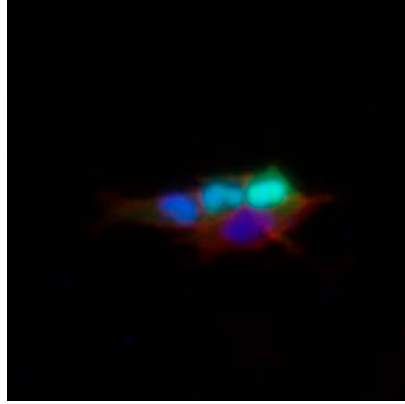

GFP

(C)

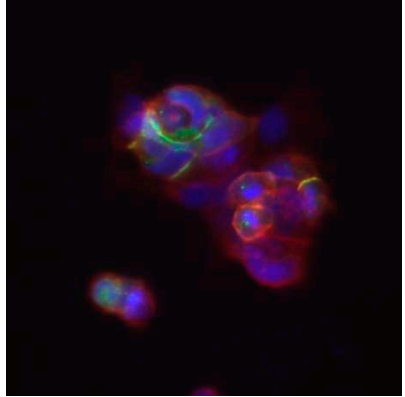

*GRIK3*<sup>WT</sup>

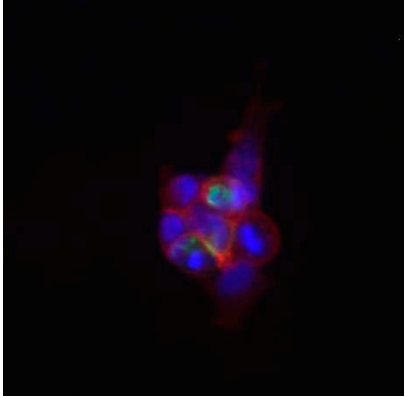

*GRIK3*<sup>p.Arg215His</sup>

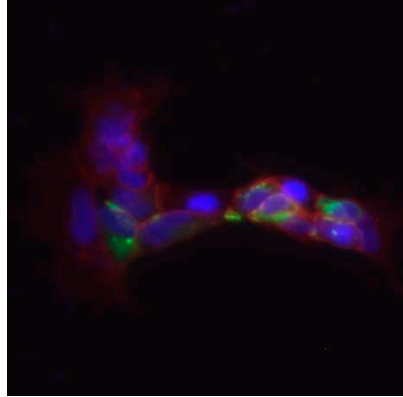

*GRIK3*<sup>p.Ser310Ala</sup>

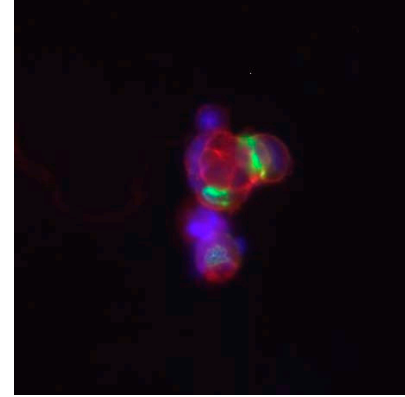

*GRIK3*<sup>p.Ser310Pro</sup>

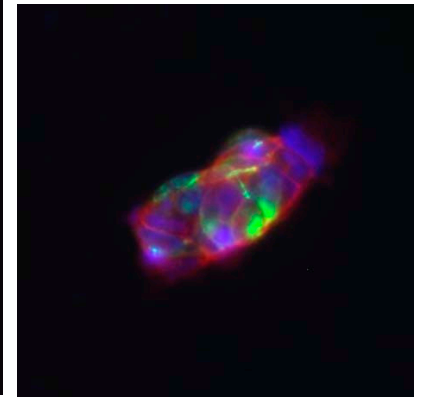

*GRIK3*<sup>p.Gly360Ser</sup>

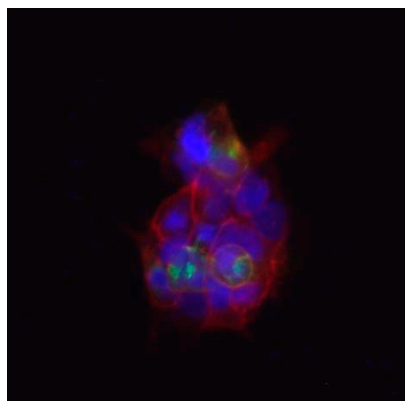

*GRIK3*<sup>p.Val746Ile</sup>

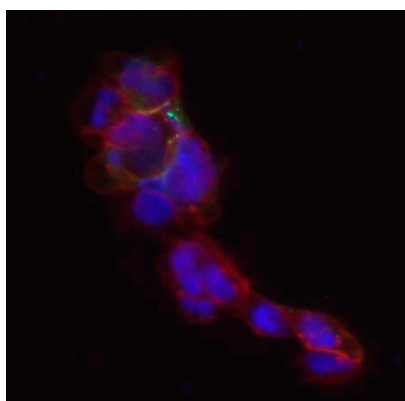

*GRIK3*<sup>p.Arg867Cys</sup>

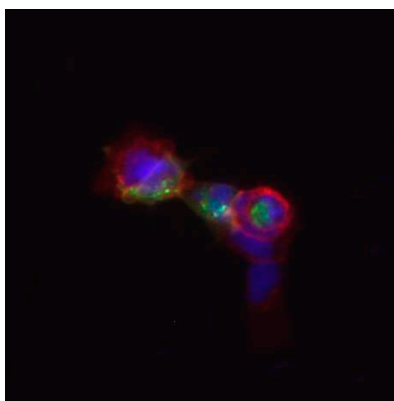

*GRIK3*<sup>p.Pro903Ala</sup>

(D)

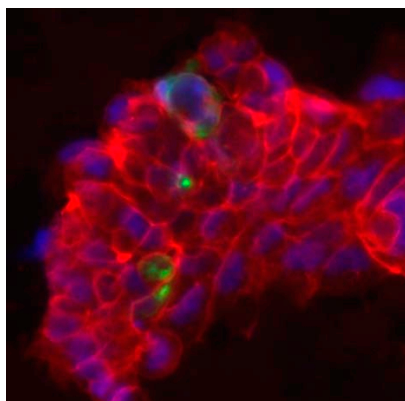

*GRIK4*<sup>WT</sup>

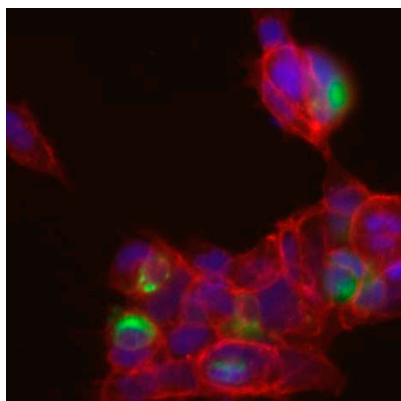

*GRIK4*<sup>p.Ser222Cys</sup>

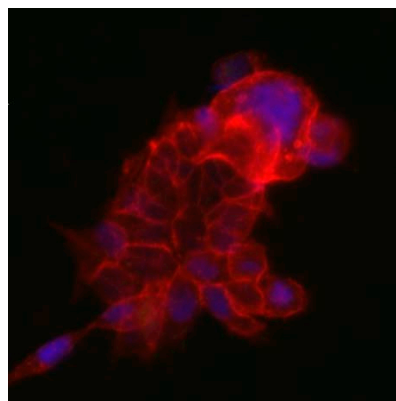

*GRIK4*<sup>p.Gln342Ter</sup>

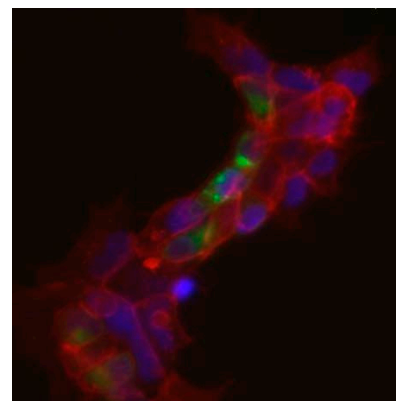

*GRIK4*<sup>p.Ser402Asn</sup>

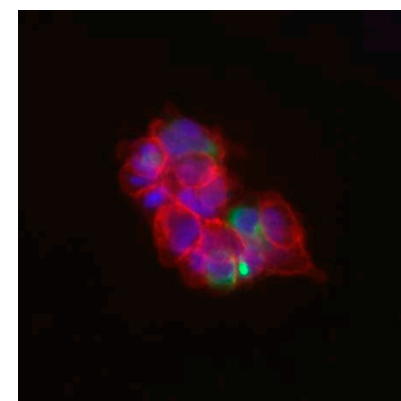

*GRIK4*<sup>p.His403Gln</sup>

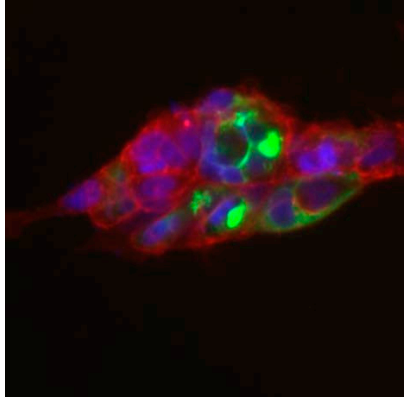

*GRIK4*p.Arg460Gln

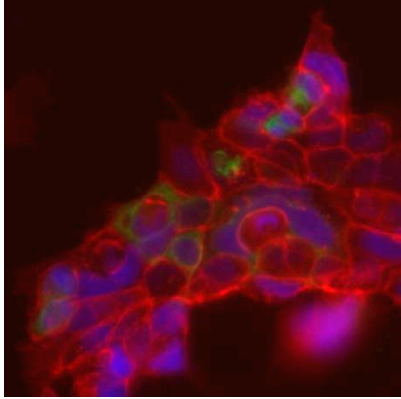

*GRIK4*p.Arg507Trp

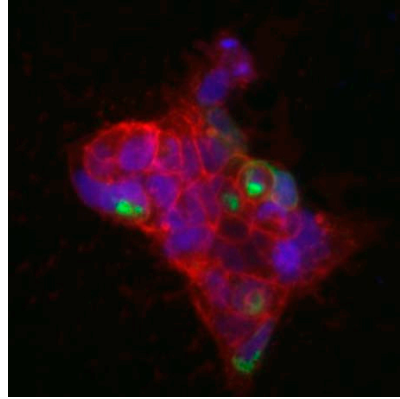

*GRIK4*p.Arg583Gln

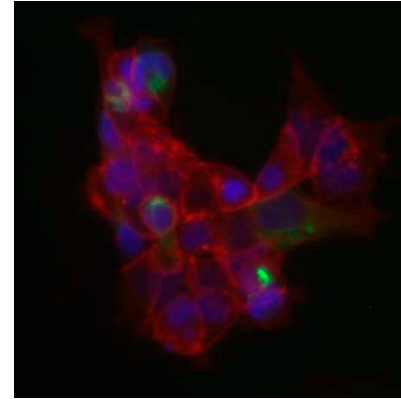

*GRIK4*p.Pro600Leu

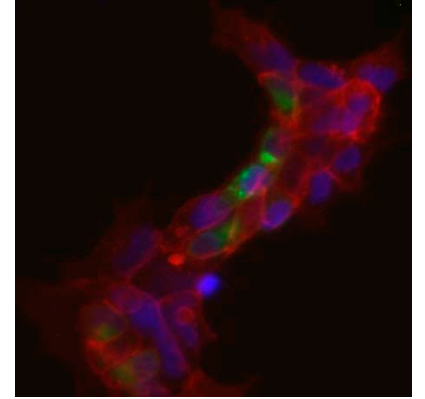

*GRIK4*p.Arg760Pro

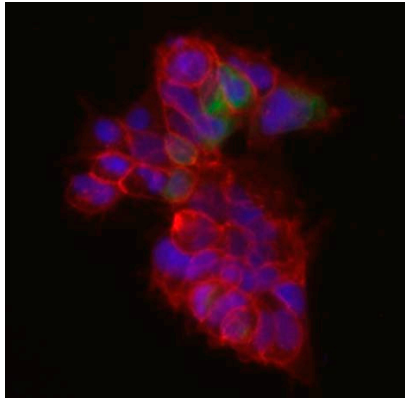

*GRIK4*p.Asp857Asn

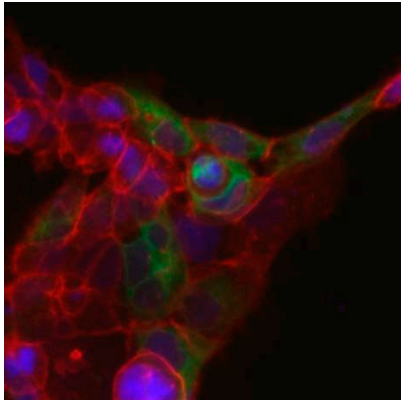

*GRIK4*p.Pro873Ser

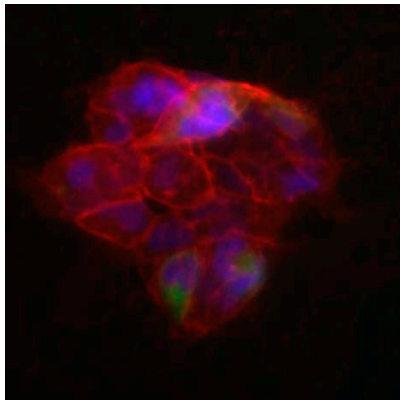

*GRIK4*p.Pro923Thr

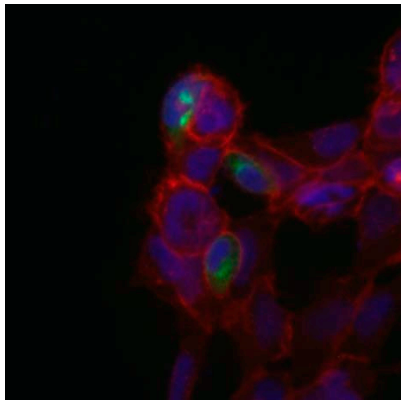

*GRIK4*p.Arg927His



**(E)**

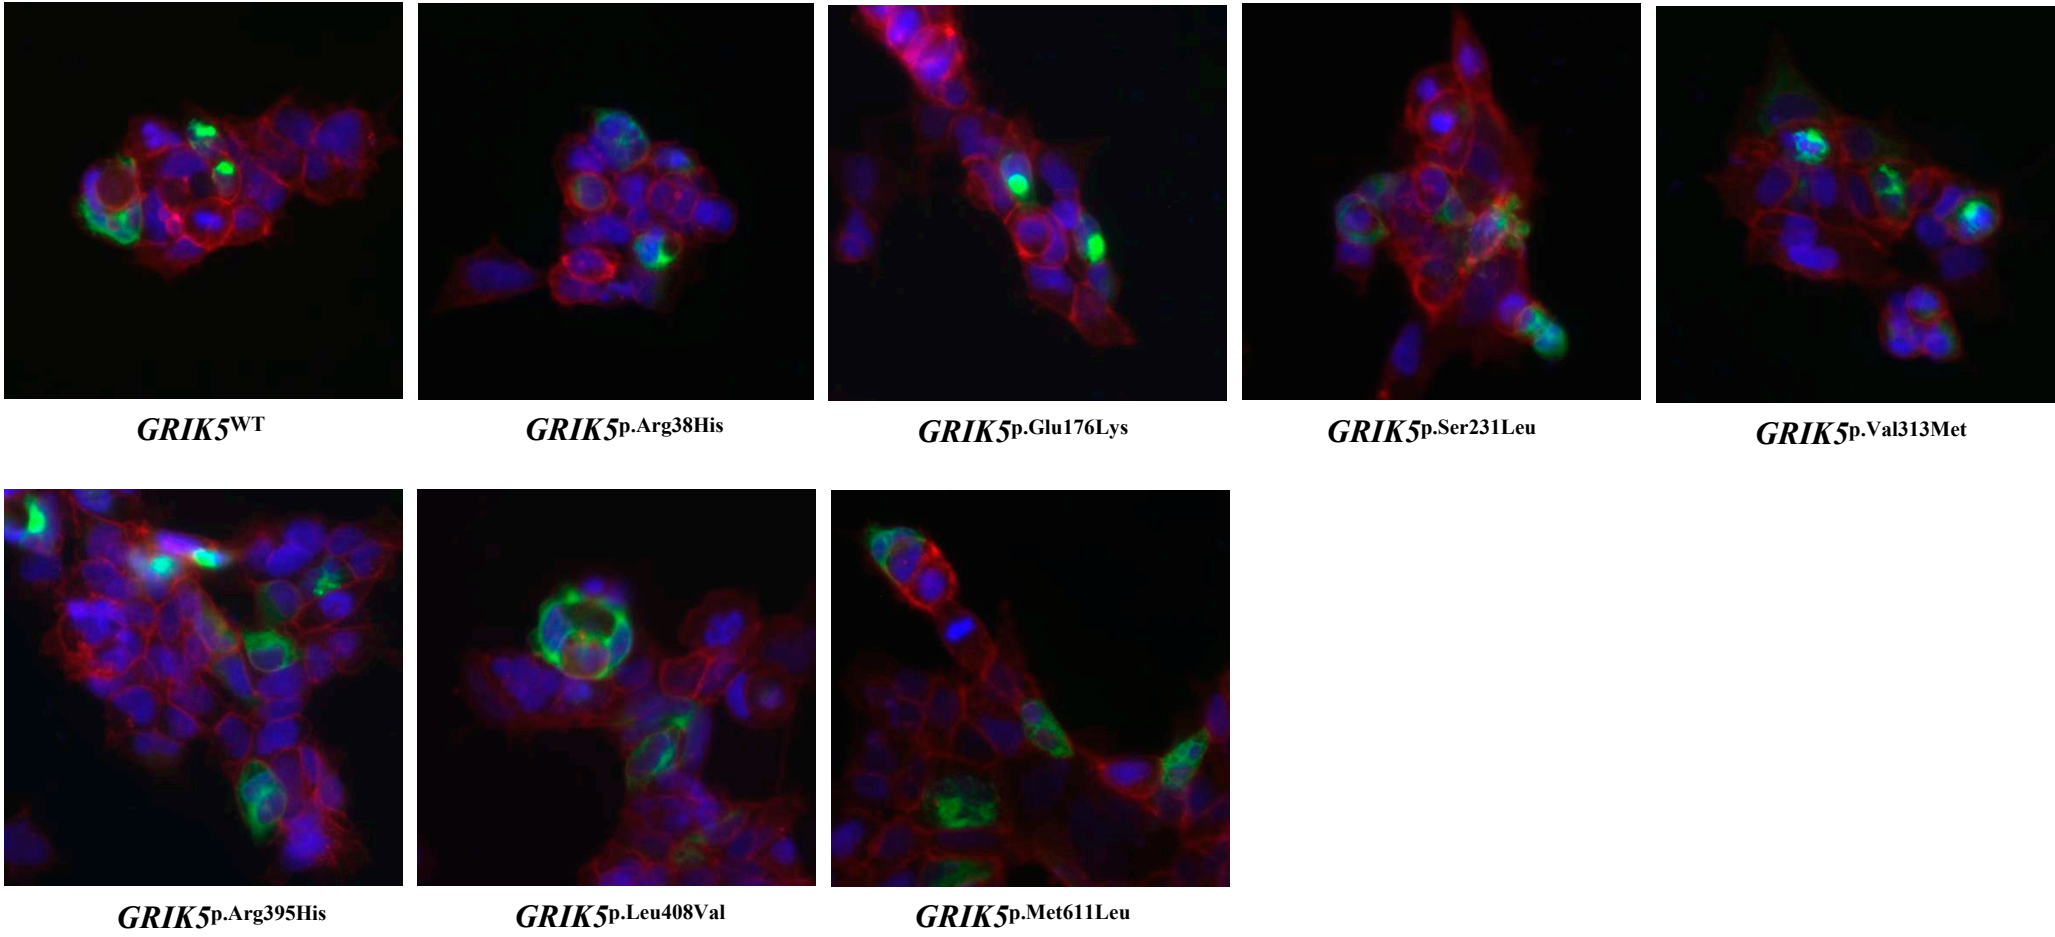

**Supplementary Figure 3.** Localization analysis of GRIK gene family mutants in HEK-293 cells. (A) GRIK1; (B) GRIK2; (C) GRIK3; (D) GRIK4; (E) GRIK5. Green: target gene. Red: cell membrane marker (wheat germ agglutinin). Blue: cell nuclei (DAPI).
